# Supplementary material for: The Evolutionary Relationship between Microbial Rhodopsins and Metazoan Rhodopsins
Source: PubMed Central journal article supplement (PMC3583139; doi:10.1155/2013/435651), 2013-02-11

**Supplemental table 1.** Rhodopsin genes identified in microbial genomes.

| <b>NCBI accession No.</b> | <b>Protein name</b> | <b>Species</b>                                      | <b>Tree name in this study</b> |
|---------------------------|---------------------|-----------------------------------------------------|--------------------------------|
| 21218339                  | sensory opsin B     | Chlamydomonas reinhardtii (Eukaryote)               | Euk_Ch1_s1                     |
| 21218337                  | sensory opsin A     | Chlamydomonas reinhardtii (Eukaryote)               | Euk_Ch1_s2                     |
| 58397464                  | opsin               | Cryptococcus neoformans var. neoformans (Eukaryote) | Euk_Cry_o1                     |
| NP_279315.1               | bacteriorhodopsin   | Halobacterium sp. NRC-1 (Archaea)                   | Arc_Hal_H4                     |
| YP_656804.1               | bacteriorhodopsin   | Haloquadratum walsbyi DSM 16790 (Archaea)           | Arc_Hal_b1                     |
| YP_137573.1               | bacteriorhodopsin   | Haloarcula marismortui ATCC 43049 (Archaea)         | Arc_Hal_b2                     |
| YP_001689404.1            | bacteriorhodopsin   | Halobacterium salinarum R1 (Archaea)                | Arc_Hal_b3                     |
| YP_136594.1               | bacteriorhodopsin   | Haloarcula marismortui ATCC 43049 (Archaea)         | Arc_Hal_b4                     |
| YP_656801.1               | bacteriorhodopsin   | Haloquadratum walsbyi DSM 16790 (Archaea)           | Arc_Hal_b5                     |
| YP_004796777.1            | halorhodopsin       | Haloarcula hispanica ATCC 33960 (Archaea)           | Arc_Hal_h1                     |
| YP_136278.1               | halorhodopsin       | Haloarcula marismortui ATCC 43049 (Archaea)         | Arc_Hal_h2                     |
| YP_658762.1               | halorhodopsin       | Haloquadratum walsbyi DSM 16790 (Archaea)           | Arc_Hal_h3                     |
| YP_003129368.1            | rhodopsin           | Halorhabdus utahensis DSM 12940 (Archaea)           | Arc_Hal_m1                     |
| YP_135281.1               | opsin               | Haloarcula marismortui ATCC 43049 (Archaea)         | Arc_Hal_o1                     |
| YP_002565246.1            | rhodopsin           | Halorubrum lacusprofundi ATCC 49239 (Archaea)       | Arc_Hal_r1                     |
| YP_003176891.1            | rhodopsin           | Halomicrobium mukohataei DSM 12286 (Archaea)        | Arc_Hal_r2                     |
| YP_002564761.1            | rhodopsin           | Halorubrum lacusprofundi ATCC 49239 (Archaea)       | Arc_Hal_r3                     |
| YP_004596944.1            | rhodopsin           | Halopiger xanaduensis SH-6 (Archaea)                | Arc_Hal_r4                     |
| YP_003178493.1            | rhodopsin           | Halomicrobium                                       | Arc_Hal_r5                     |

|                |                         |                                                               |            |
|----------------|-------------------------|---------------------------------------------------------------|------------|
|                |                         | mukohataei DSM 12286<br>(Archaea)                             |            |
| YP_003129235.1 | rhodopsin               | Halorhabdus utahensis<br>DSM 12940 (Archaea)                  | Arc_Hal_r6 |
| YP_003177111.1 | rhodopsin               | Halomicrobium<br>mukohataei DSM 12286<br>(Archaea)            | Arc_Hal_r7 |
| YP_001689625.1 | sensory rhodopsin<br>II | Halobacterium salinarum<br>R1 (Archaea)                       | Arc_Hal_s1 |
| YP_004795387.1 | sensory rhodopsin<br>I  | Haloarcula hispanica<br>ATCC 33960 (Archaea)                  | Arc_Hal_s2 |
| YP_001689548.1 | sensory rhodopsin<br>I  | Halobacterium salinarum<br>R1 (Archaea)                       | Arc_Hal_t1 |
| YP_325981.1    | halorhodopsin           | Natronomonas pharaonis<br>DSM 2160 (Archaea)                  | Arc_Nat_h1 |
| YP_003480703.1 | rhodopsin               | Natrialba magadii ATCC<br>43099 (Archaea)                     | Arc_Nat_r1 |
| YP_331142.1    | sensory rhodopsin<br>II | Natronomonas pharaonis<br>DSM 2160 (Archaea)                  | Arc_Nat_s1 |
| YP_266049.1    | bacteriorhodopsin       | Candidatus Pelagibacter<br>ubique HTCC1062<br>(Bacteria)      | Bac_Can_b1 |
| YP_003552453.1 | hypothetical<br>protein | Candidatus<br>Puniceispirillum marinum<br>IMCC1322 (Bacteria) | Bac_Can_h1 |
| YP_002484126.1 | rhodopsin               | Cyanothece sp. PCC 7425<br>(Bacteria)                         | Bac_Cya_r1 |
| YP_002379171.1 | rhodopsin               | Cyanothece sp. PCC 7424<br>(Bacteria)                         | Bac_Cya_r2 |
| YP_001813902.1 | rhodopsin               | Exiguobacterium<br>sibiricum 255-15<br>(Bacteria)             | Bac_Exi_r1 |
| YP_002885111.1 | rhodopsin               | Exiguobacterium sp.<br>AT1b (Bacteria)                        | Bac_Exi_r2 |
| YP_003410608.1 | rhodopsin               | Geodermatophilus<br>obscurus DSM 43160<br>(Bacteria)          | Bac_Geo_r1 |
| YP_004870549.1 | bacteriorhodopsin       | Glaciecola nitratireducens<br>FR1064 (Bacteria)               | Bac_Gla_b1 |
| NP_923144.1    | bacteriorhodopsin       | Gloeobacter violaceus<br>PCC 7421 (Bacteria)                  | Bac_Glo_b1 |
| YP_004446506.1 | rhodopsin               | Haliscomenobacter<br>hydrossis DSM 1100<br>(Bacteria)         | Bac_Hal_r1 |

|                |                         |                                                         |            |
|----------------|-------------------------|---------------------------------------------------------|------------|
| YP_004180611.1 | rhodopsin               | Isosphaera pallida ATCC 43644 (Bacteria)                | Bac_Iso_r1 |
| YP_001361545.1 | rhodopsin               | Kineococcus radiotolerans SRS30216 (Bacteria)           | Bac_Kin_r1 |
| YP_004429763.1 | rhodopsin               | Krokinobacter sp. 4H-3-7-5 (Bacteria)                   | Bac_Kro_r1 |
| YP_004431469.1 | rhodopsin               | Krokinobacter sp. 4H-3-7-5 (Bacteria)                   | Bac_Kro_r2 |
| EFH82634.1     | rhodopsin               | Ktedonobacter racemifer DSM 44963 (Bacteria)            | Bac_Kte_r1 |
| YP_004054869.1 | rhodopsin               | Marivirga tractuosa DSM 4126 (Bacteria)                 | Bac_Mar_r1 |
| EAV46596.1     | hypothetical protein    | Methylophilales bacterium HTCC2181 (Bacteria)           | Bac_Met_h1 |
| YP_001767533.1 | rhodopsin               | Methylobacterium sp. 4-46 (Bacteria)                    | Bac_Met_r1 |
| NP_487205.1    | bacteriorhodopsin       | Nostoc sp. PCC 7120 (Bacteria)                          | Bac_Nos_b1 |
| YP_003931488.1 | archaerhodopsin-1       | Pantoea vagans C9-1 (Bacteria)                          | Bac_Pan_h1 |
| YP_001277280.1 | rhodopsin               | Roseiflexus sp. RS-1 (Bacteria)                         | Bac_Ros_r1 |
| YP_644794.1    | rhodopsin               | Rubrobacter xylanophilus DSM 9941 (Bacteria)            | Bac_Rub_r1 |
| YP_004653826.1 | rhodopsin               | Runella slithyformis DSM 19594 (Bacteria)               | Bac_Run_r1 |
| EHI47868.1     | bacteriorhodopsin       | SAR116 cluster alpha proteobacterium HIMB100 (Bacteria) | Bac_SAR_B1 |
| YP_003572867.1 | halorhodopsin           | Salinibacter ruber M8 (Bacteria)                        | Bac_Sal_H1 |
| YP_003571571.1 | xanthorhodopsin         | Salinibacter ruber M8 (Bacteria)                        | Bac_Sal_X1 |
| YP_003572671.1 | sensory rhodopsin I     | Salinibacter ruber M8 (Bacteria)                        | Bac_Sal_s1 |
| YP_446609.1    | sensory rhodopsin (SRI) | Salinibacter ruber DSM 13855 (Bacteria)                 | Bac_Sal_s2 |
| YP_003391271.1 | rhodopsin               | Spirosoma linguale DSM 74 (Bacteria)                    | Bac_Spi_r1 |
| YP_003386489.1 | rhodopsin               | Spirosoma linguale DSM 74 (Bacteria)                    | Bac_Spi_r2 |

|                |                         |                                                    |            |
|----------------|-------------------------|----------------------------------------------------|------------|
| YP_004537746.1 | rhodopsin               | Thioalkalimicrobium<br>cyclicum ALM1<br>(Bacteria) | Bac_Thi_r1 |
| YP_003705905.1 | rhodopsin               | Truepera radiovictrix<br>DSM 17093 (Bacteria)      | Bac_Trु_r1 |
| YP_003706581.1 | rhodopsin               | Truepera radiovictrix<br>DSM 17093 (Bacteria)      | Bac_Trु_r2 |
| YP_003706549.1 | rhodopsin               | Truepera radiovictrix<br>DSM 17093 (Bacteria)      | Bac_Trु_r3 |
| YP_001445352.1 | hypothetical<br>protein | Vibrio harveyi ATCC<br>BAA-1116 (Bacteria)         | Bac_Vib_h1 |

**Supplemental table 2.** Microbial rhodopsin gene divergently related to metazoan rhodopsin's ancestral states and how many metazoan rhodopsin's ancestral states it is related to. Here 95% quantile = 15.25.

| <b>Tree name of microbial rhodopsin<br/>divergently related to metazoan<br/>rhodopsin's ancestral states</b> | <b>How many metazoan rhodopsin's<br/>ancestral states it is related to (out of<br/>24)</b> |
|--------------------------------------------------------------------------------------------------------------|--------------------------------------------------------------------------------------------|
| Bac_Exi_r2                                                                                                   | 2                                                                                          |
| Bac_Pan_h1                                                                                                   | 4                                                                                          |
| Bac_Rub_r1                                                                                                   | 12                                                                                         |
| Arc_Hal_h2                                                                                                   | 11                                                                                         |
| Bac_SAR_B1                                                                                                   | 2                                                                                          |
| Bac_Kin_r1                                                                                                   | 10                                                                                         |
| Bac_Cya_r1                                                                                                   | 7                                                                                          |
| Bac_Thi_r1                                                                                                   | 1                                                                                          |
| Arc_Hal_r3                                                                                                   | 12                                                                                         |
| Arc_Hal_r5                                                                                                   | 4                                                                                          |
| Arc_Hal_m1                                                                                                   | 2                                                                                          |
| Bac_Ros_r1                                                                                                   | 5                                                                                          |
| Bac_Trु_r1                                                                                                   | 7                                                                                          |
| Bac_Spi_r2                                                                                                   | 4                                                                                          |
| Arc_Hal_s1                                                                                                   | 1                                                                                          |
| Arc_Hal_s2                                                                                                   | 2                                                                                          |
| Arc_Hal_b5                                                                                                   | 1                                                                                          |
| Bac_Mar_r1                                                                                                   | 1                                                                                          |
| Bac_Can_b1                                                                                                   | 4                                                                                          |
| Arc_Hal_r7                                                                                                   | 1                                                                                          |
| Bac_Kro_r2                                                                                                   | 2                                                                                          |
| Bac_Geo_r1                                                                                                   | 1                                                                                          |
| Bac_Can_h1                                                                                                   | 4                                                                                          |
| Bac_Sal_s1                                                                                                   | 5                                                                                          |
| Arc_Hal_t1                                                                                                   | 2                                                                                          |

|             |                     |
|-------------|---------------------|
| Bac_Tr_u_r2 | 12                  |
| Arc_Hal_r1  | 15                  |
| Arc_Hal_b3  | 5                   |
| Bac_Exi_r1  | 6                   |
| Euk_Ch_l_s1 | 7                   |
| Bac_Iso_r1  | 1                   |
| Bac_Glo_b1  | 3                   |
| Bac_Nos_b1  | 3                   |
| Bac_Sal_X1  | 6                   |
| Bac_Met_r1  | 3                   |
| Bac_Kro_r1  | 4                   |
| Arc_Hal_b4  | 1                   |
| Arc_Nat_h1  | 17 (> 95% quantile) |
| Arc_Hal_b1  | 1                   |
| Arc_Hal_r4  | 3                   |
| Arc_Nat_r1  | 16 (> 95% quantile) |
| Bac_Hal_r1  | 1                   |
| Arc_Hal_h1  | 10                  |
| Bac_Spi_r1  | 1                   |
| Bac_Tr_u_r3 | 2                   |
| Arc_Hal_r2  | 12                  |
| Bac_Sal_H1  | 10                  |
| Arc_Hal_o1  | 3                   |
| Arc_Hal_H4  | 11                  |
| Bac_Met_h1  | 9                   |
| Euk_Cry_o1  | 5                   |
| Arc_Nat_s1  | 1                   |
| Bac_Gla_b1  | 8                   |
| Euk_Ch_l_s2 | 6                   |
| Bac_Run_r1  | 3                   |
| Arc_Hal_h3  | 16 (> 95% quantile) |

## Supplemental figure legends

**Supplemental figure 1.** Neighbor-joining tree for all metazoan rhodopsin genes. It is based on JTT model and 4 Gamma parameters. The numbers adjacent to tree nodes are bootstrap values. Hydra rhodopsins serve as outgroup. Green, red and blue clades are three major groups in this tree.

**Supplemental figure 2.** Maximum-likelihood tree for all metazoan rhodopsin genes. It is based on WAG model and 4 Gamma parameters. The numbers adjacent to the nodes are approximate likelihood-ratio test results. Hydra rhodopsins serve as outgroup. Green, red and blue clades are three major groups according to NJ tree. They are mixed in ML tree.

**Supplemental figure 3.** Bayesian tree for all metazoan rhodopsin genes. It is based on WAG model and 4 Gamma parameters. The numbers adjacent to the nodes are posterior probability values. Hydra rhodopsins serve as outgroup. Green, red and blue clades are three major groups according to NJ tree. They are mixed in Bayesian tree.

**Supplemental figure 4.** Unrooted Bayesian tree for all microbial rhodopsin genes. The numbers adjacent to the nodes are posterior probability values. The length of branch reflects evolutionary divergence. Green branch means archaea taxon. Red branch means eukaryote taxon. Blue branch means bacteria taxon.

**Supplemental figure 5.** Unrooted maximum-likelihood tree for all microbial rhodopsin genes. The numbers adjacent to the nodes are approximate likelihood-ratio test results. The length of branch reflects evolutionary divergence. Green branch means archaea taxon. Red branch means eukaryote taxon. Blue branch means bacteria taxon.

**Supplemental figure 6.** Unrooted neighbor-joining tree for all microbial rhodopsin genes. The numbers adjacent to tree nodes are bootstrap values. The length of branch reflects evolutionary divergence. Green branch means archaea taxon. Red branch means eukaryote taxon. Blue branch means bacteria taxon.

Supplemental figure 1.

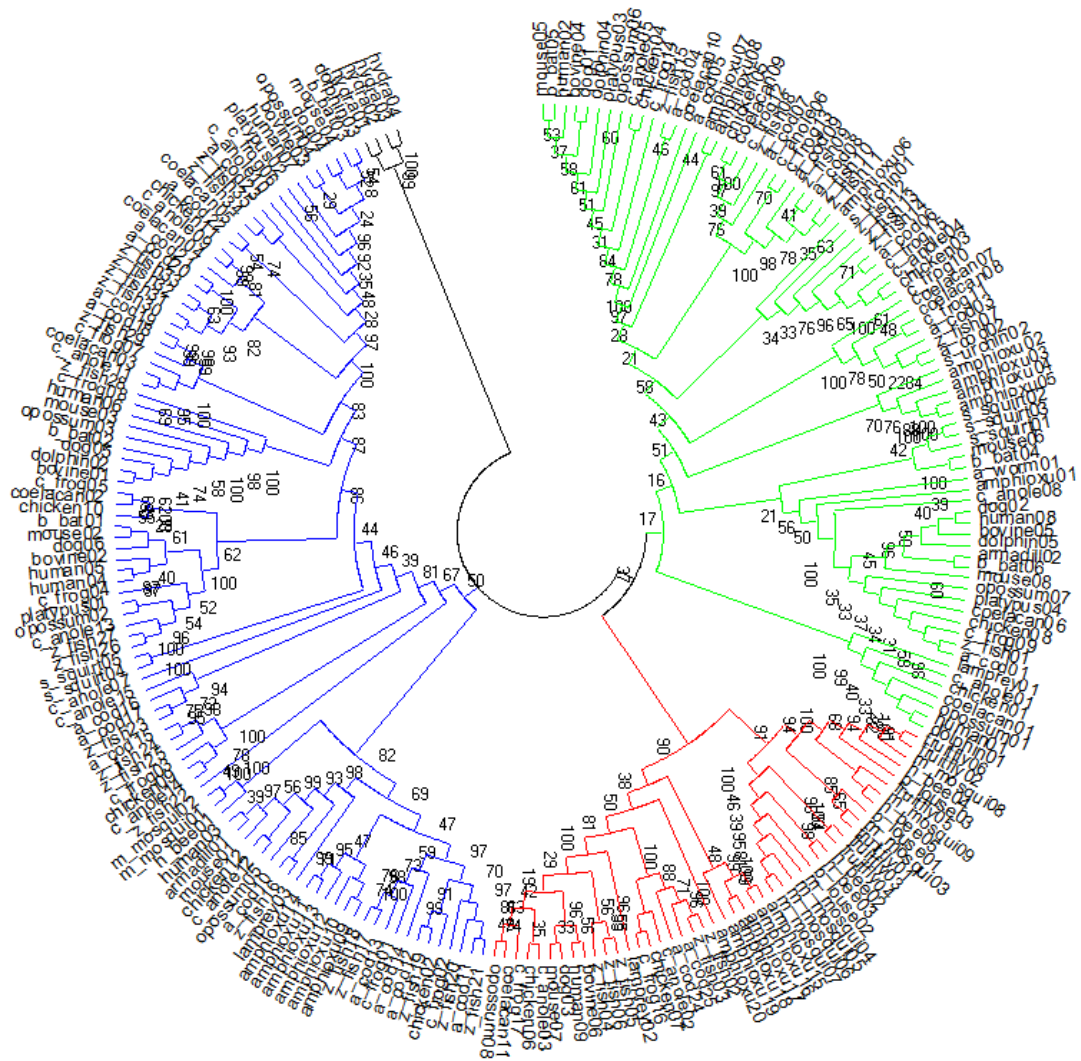

Supplemental figure 2.

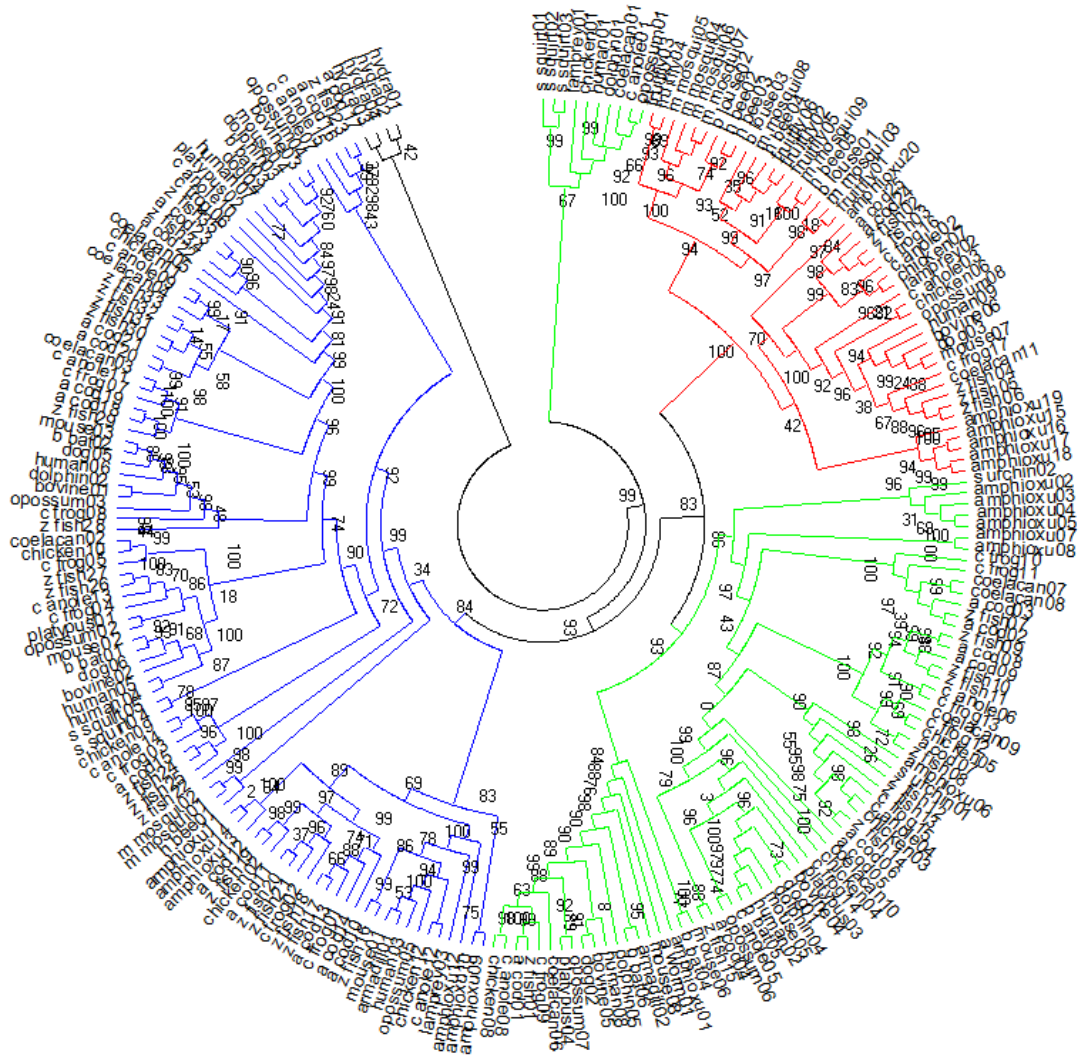



Supplemental figure 3.

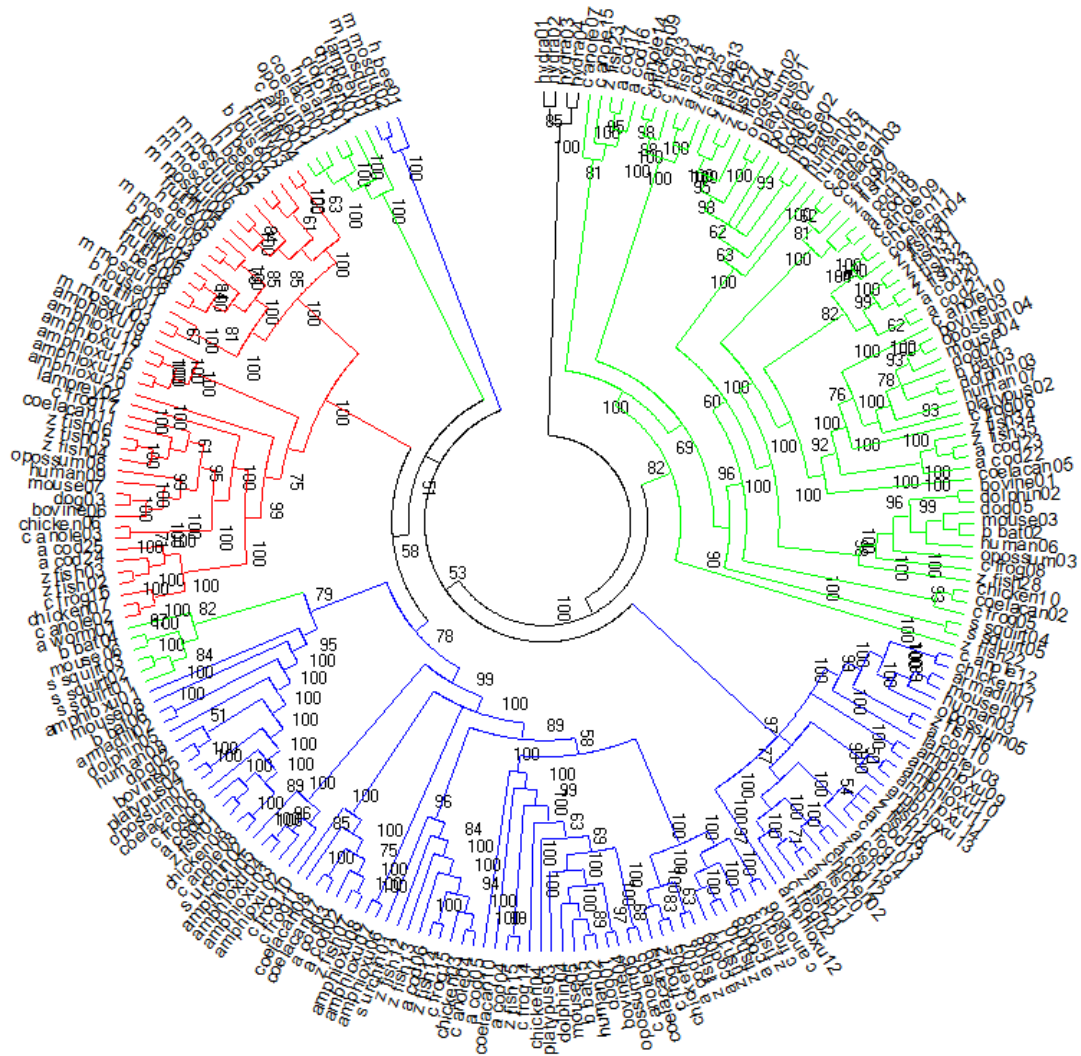

Supplemental figure 4.

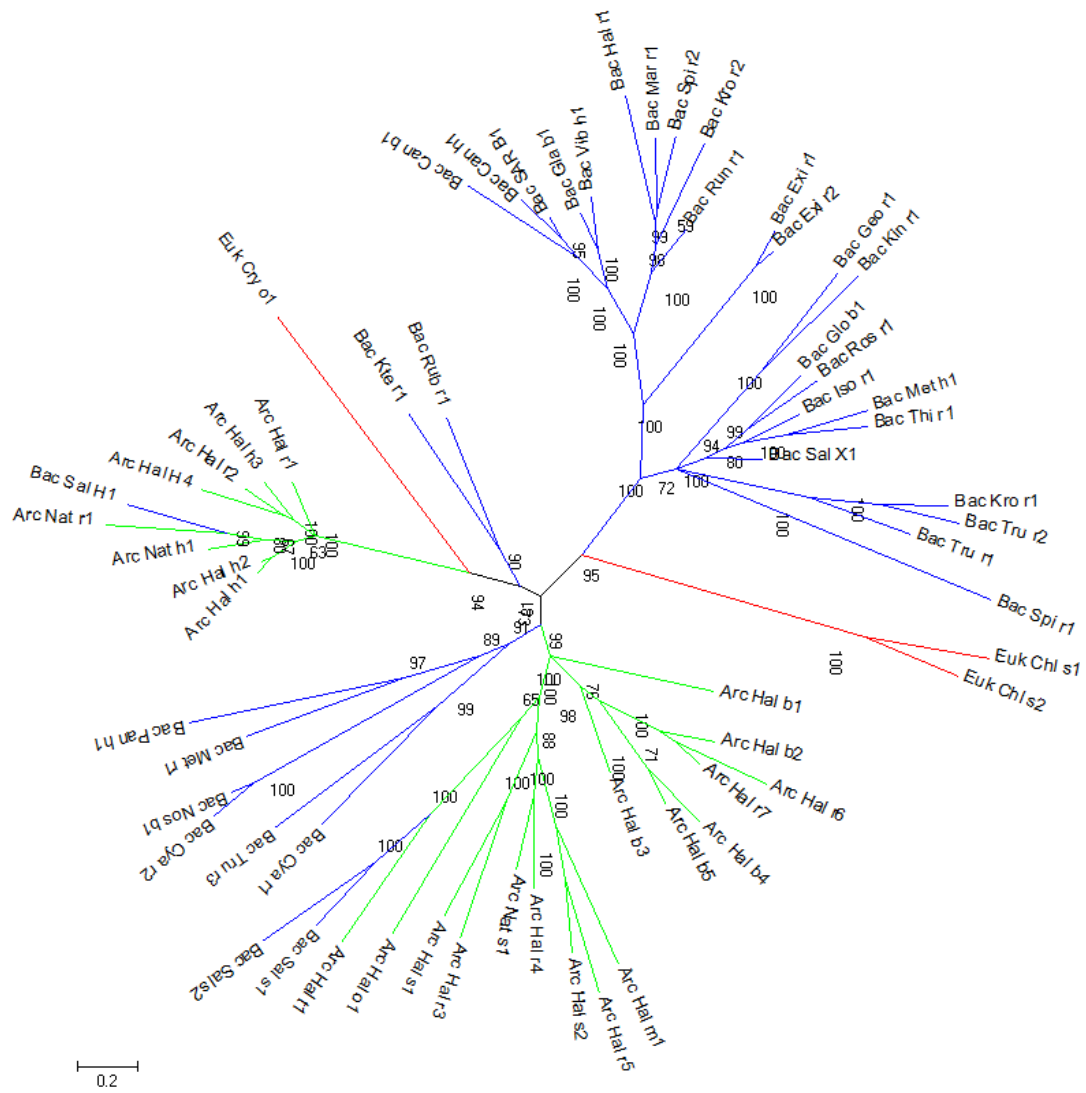

Supplemental figure 5.

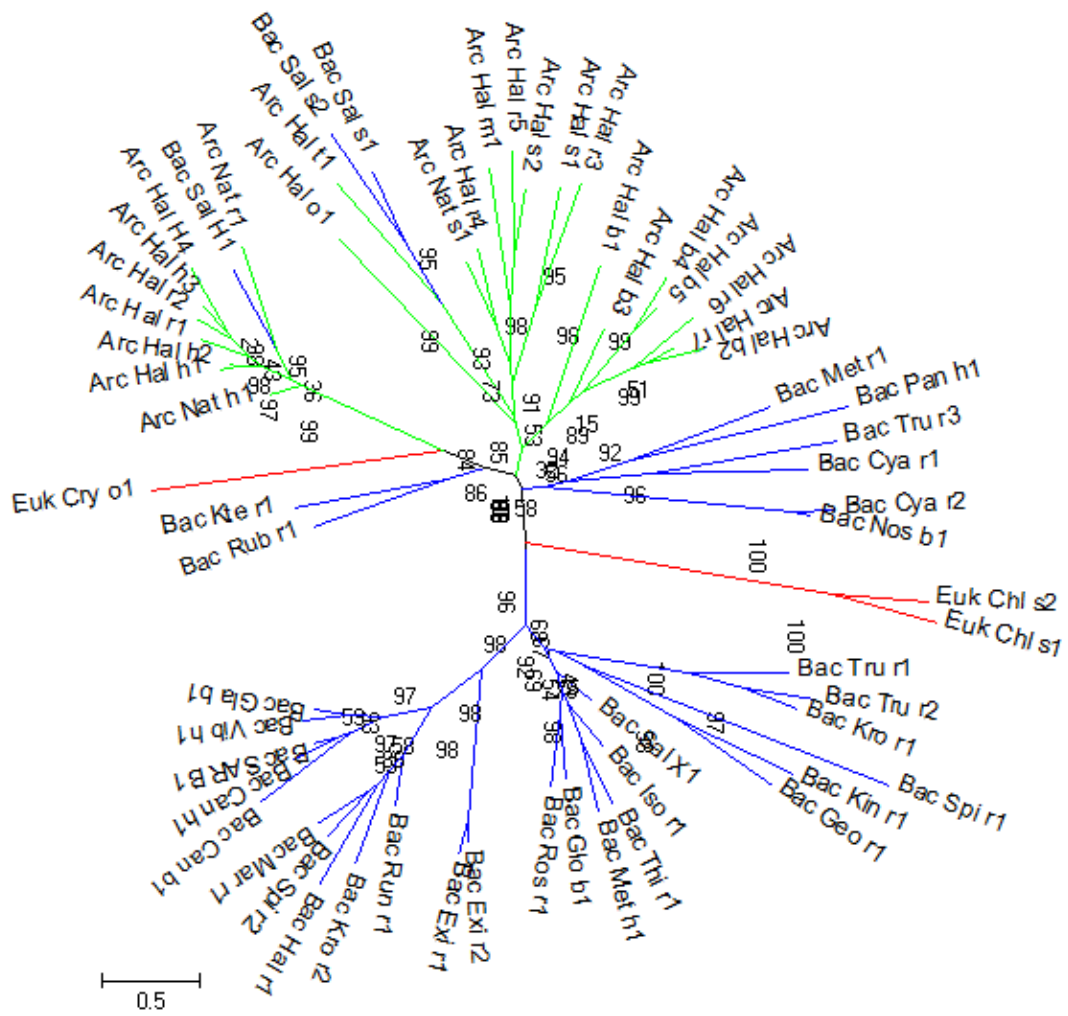

Supplemental figure 6.

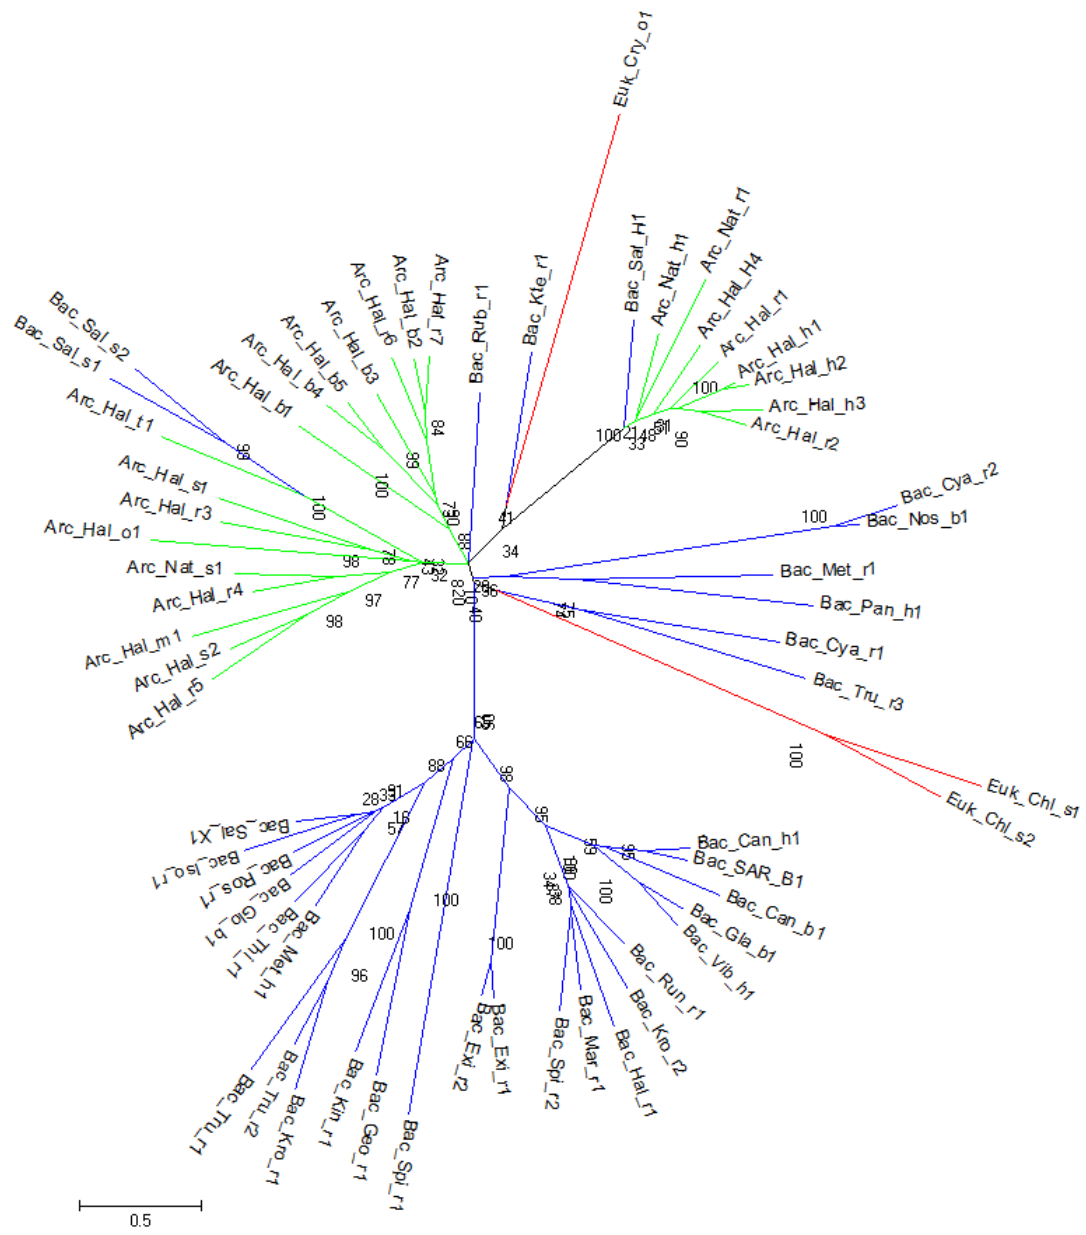

Supplement: 435651.f1.pdf [file 435651.f1.pdf]
